# Supplementary material for: Transcriptional profiling analysis and functional prediction of long noncoding RNAs in cancer
Source: PubMed Central journal article supplement (PMC4884981; doi:10.18632/oncotarget.6993), 2016-01-23
Supplement: oncotarget-07-8131-s001.pdf [file oncotarget-07-8131-s001.pdf]

## Transcriptional profiling analysis and functional prediction of long noncoding RNAs in cancer

### Supplementary Materials

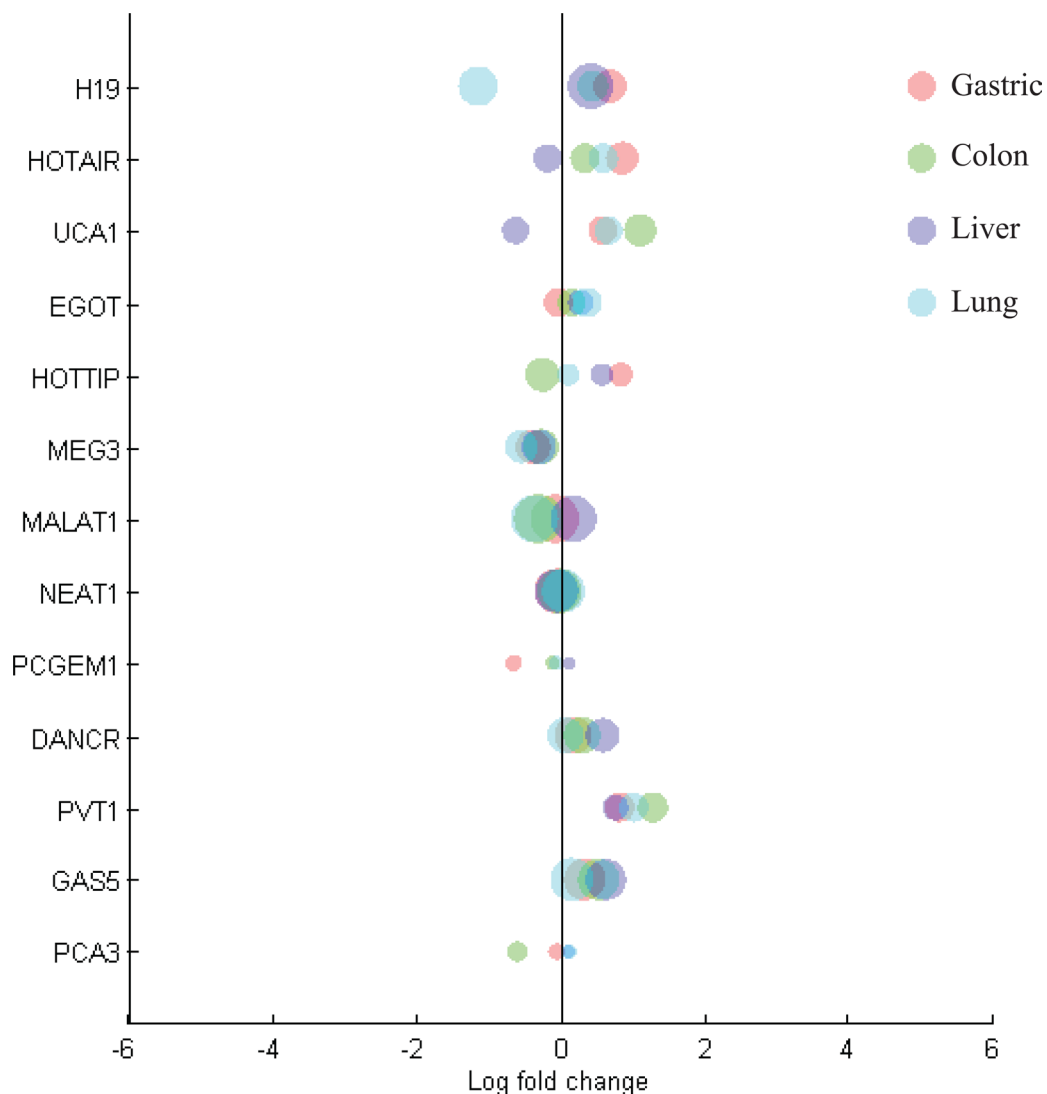

**Supplementary Figure S1: Expression of literature-curated lncRNAs revealed by our data.** Expression levels of literature-curated cancer-related lncRNAs across different types of cancer (tissues were denoted by different color). The size of each point represents the average expression level while the x-axis shows log<sub>2</sub> fold change of expression level of cancer sample compared to adjacent non-cancerous sample.

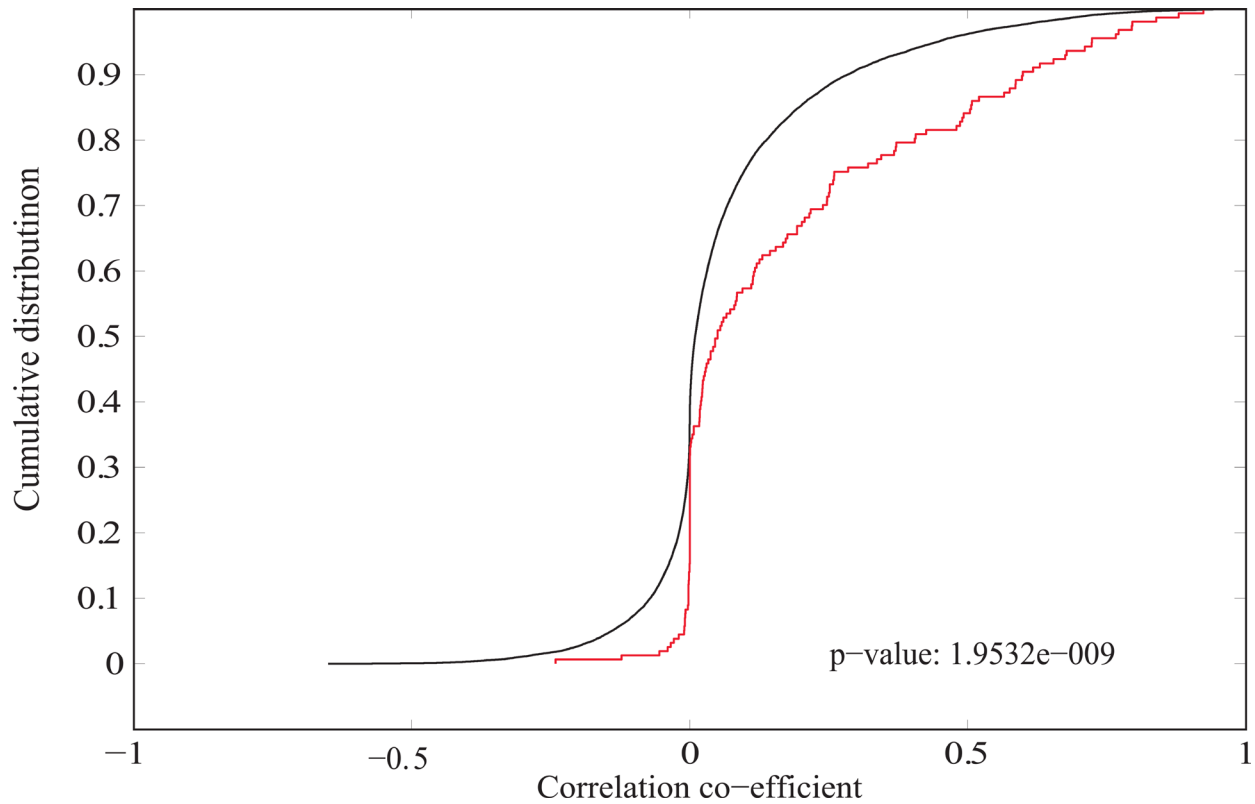

**Supplementary Figure S2: Expression correlation analysis for lncRNAs and their neighboring PCGs.** Empirical cumulative distribution plot of expression correlation coefficients for pairs of lncRNAs and their neighboring PCGs (red line for common DE-lncRNAs and black line for other lncRNAs as background). Rank-sum test showed significant difference between them, suggesting a whole tendency to be positive correlated for expression profile of common DE-lncRNAs and their neighboring PCGs.

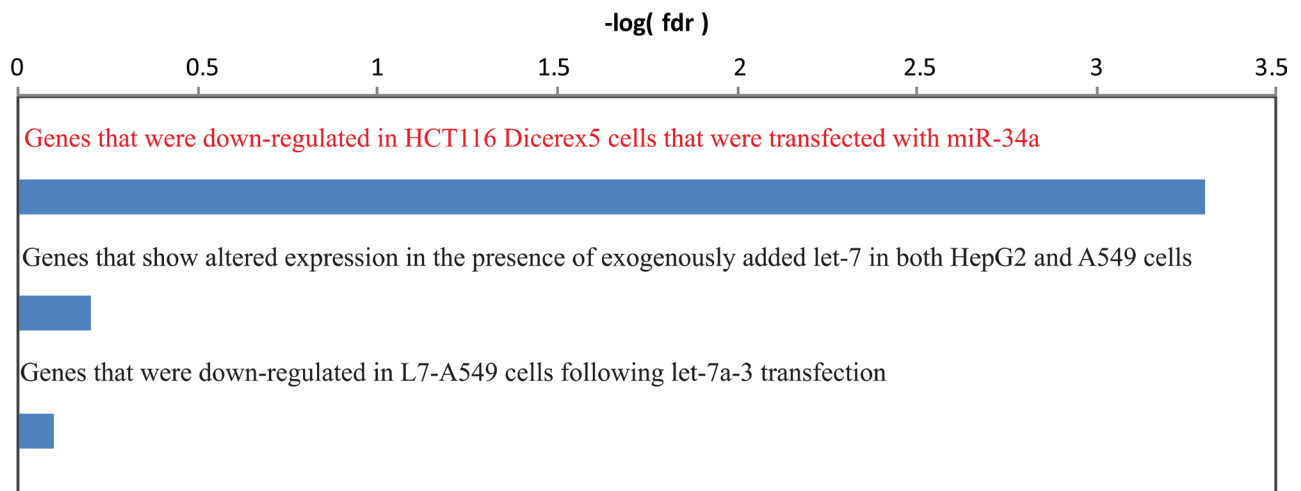

**Supplementary Figure S3: miRNA target enrichment in cis mRNAs of lncRNAs.** The height of each bar represents enrichment significance in the neighboring PCGs of common up-regulated lncRNAs calculated by GREAT (Genomic Regions Enrichment of Annotations Tool). The enrichment for miRNA targets ontology collected by Ron Shamir's group from the literature was presented.

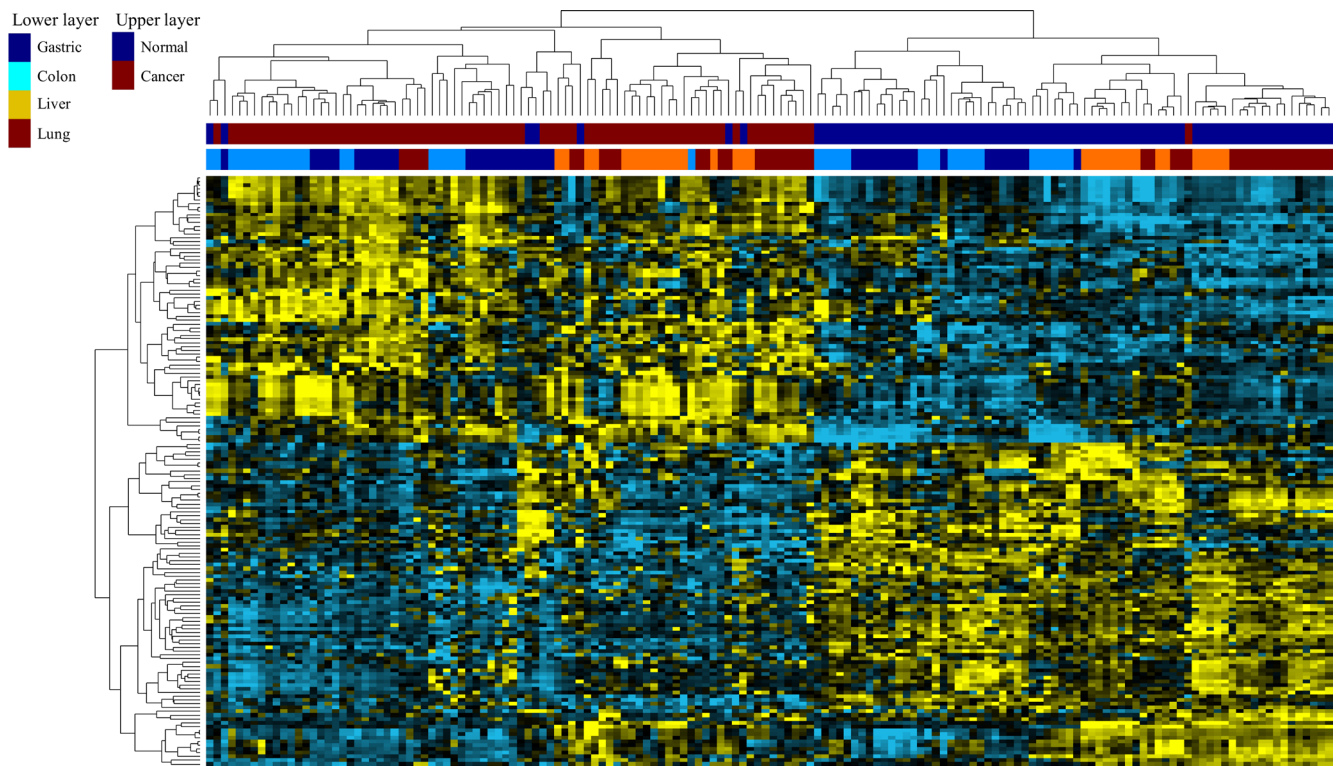

**Supplementary Figure S4: Unsupervised hierarchical clustering of all samples.** The expression profile of the 157 identified common DE-lncRNAs was used. Hierarchical clustering clearly separated tumor (red bar) and adjacent non-tumor (blue bar) samples with misclassification tolerated. Although different types of tissue were not clustered exactly, there is a tendency for liver tissues to be clustered with lung tissues, similar to that of gastric tissues with colon tissues.

### Hits

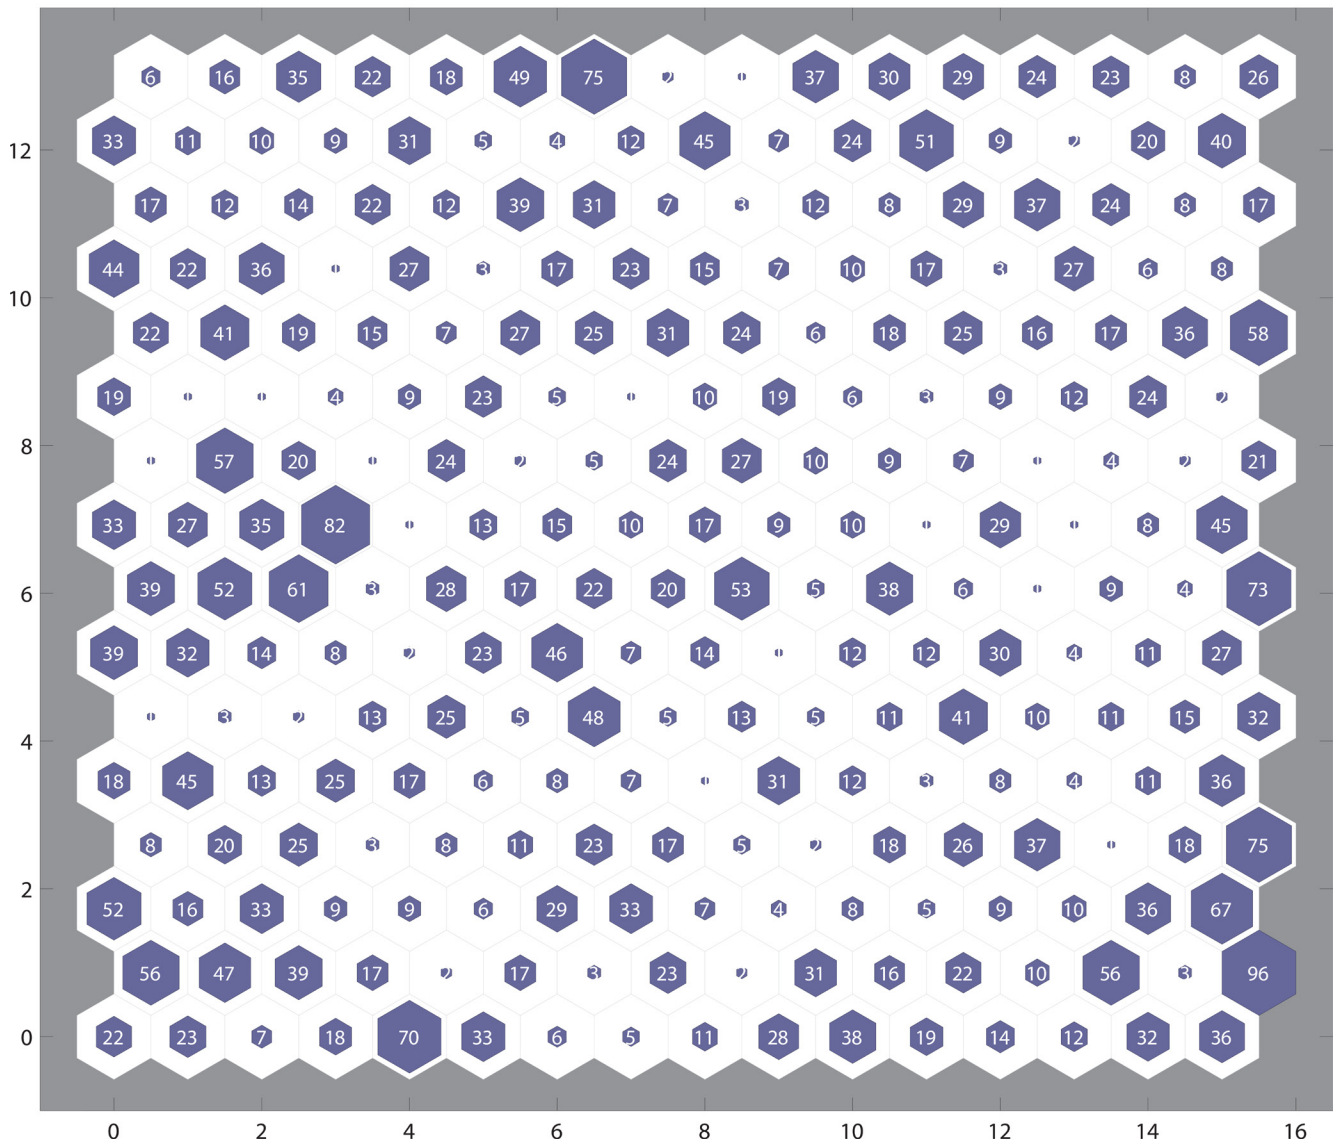

**Supplementary Figure S5: The layout of SOM grids.** Each grid is a cluster of lncRNAs and PCGs which are near each other not only in the SOM grid but also in multivariate space. The value shown in each grid represents the number of lncRNAs and PCGs clustered in the grid.

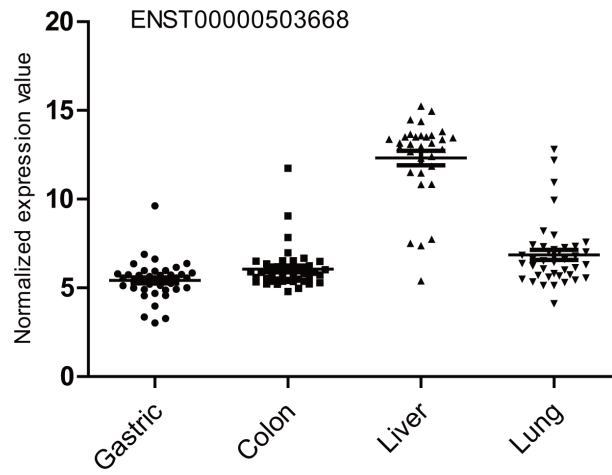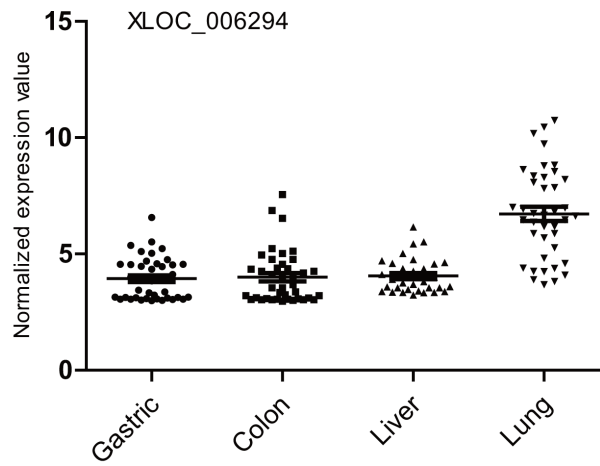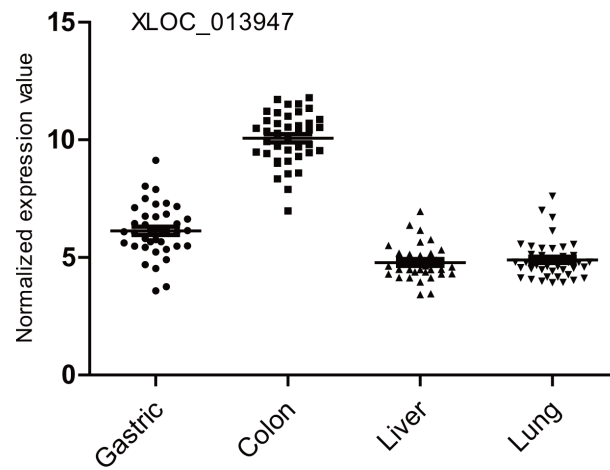

**Supplementary Figure S6: Expression of tissue-specific lncRNAs based on the microarray data.** Each scatter diagram illustrates the tissue-specific lncRNA possessing the higher expression level in specific tissue than the three others.

**Supplementary File S1: List of DE-lncRNAs and DE-PCGs that are common in all four types of cancer**

**Supplementary File S2: List of DE-lncRNAs and DE-PCGs that show tissue specific expression features**

| <b>GeneName</b> | <b>Gastric</b> | <b>Colon</b> | <b>Liver</b> | <b>Lung</b> |
|-----------------|----------------|--------------|--------------|-------------|
| A4GNT           | 0.450894       | 0.123839     | 0.174321     | 0.250946    |
| AKR1B10         | 0.405057       | 0.26333      | 0.143103     | 0.18851     |
| AKR1B15         | 0.410131       | 0.282336     | 0.154885     | 0.152649    |
| ALDH3A1         | 0.422085       | 0.248022     | 0.102597     | 0.227296    |
| ANXA10          | 0.44496        | 0.206914     | 0.215858     | 0.132267    |
| ATP4A           | 0.437135       | 0.25817      | 0.103027     | 0.201668    |
| ATP4B           | 0.442638       | 0.262642     | 0.139491     | 0.155229    |
| C1orf129        | 0.437994       | 0.202098     | 0.130203     | 0.229704    |
| C1orf49         | 0.434813       | 0.108617     | 0.149037     | 0.307534    |
| C20orf114       | 0.432577       | 0.086085     | 0.151015     | 0.330323    |
| C3orf57         | 0.428879       | 0.156605     | 0.180513     | 0.234004    |
| C6orf58         | 0.45399        | 0.167871     | 0.150413     | 0.227726    |
| CCKAR           | 0.416925       | 0.142501     | 0.134847     | 0.305728    |
| CPA2            | 0.413227       | 0.230392     | 0.130633     | 0.225748    |
| DAZ2            | 0.404713       | 0.139319     | 0.176213     | 0.279756    |
| DAZL            | 0.398005       | 0.154627     | 0.173805     | 0.273564    |
| DPCR1           | 0.454162       | 0.222394     | 0.114723     | 0.20872     |
| FBP2            | 0.447626       | 0.245184     | 0.134675     | 0.172515    |
| FMO6P           | 0.441348       | 0.150843     | 0.125129     | 0.28268     |
| FUT9            | 0.427159       | 0.116701     | 0.147059     | 0.309082    |
| GHRL            | 0.435329       | 0.165979     | 0.154025     | 0.244668    |
| GIF             | 0.452098       | 0.244066     | 0.082559     | 0.221276    |
| GKN1            | 0.455366       | 0.191348     | 0.136223     | 0.217062    |
| KCNE2           | 0.443584       | 0.181975     | 0.148349     | 0.226092    |
| LIPF            | 0.452356       | 0.144221     | 0.128397     | 0.275026    |
| LOC100128893    | 0.407981       | 0.274338     | 0.160131     | 0.157551    |
| LOC646804       | 0.437393       | 0.210956     | 0.139405     | 0.212246    |
| LYPD6B          | 0.438338       | 0.262728     | 0.084279     | 0.214654    |
| MIA             | 0.426127       | 0.265566     | 0.087633     | 0.220674    |
| MUC6            | 0.449346       | 0.252322     | 0.144565     | 0.153767    |
| NMUR2           | 0.427245       | 0.218008     | 0.071207     | 0.28354     |
| PDIA2           | 0.446336       | 0.291366     | 0.091159     | 0.171139    |
| PSAPL1          | 0.442724       | 0.101307     | 0.172687     | 0.283282    |
| PSCA            | 0.455108       | 0.20227      | 0.089783     | 0.252838    |
| REG3A           | 0.420967       | 0.302804     | 0.140695     | 0.135535    |
| REG3G           | 0.420193       | 0.237014     | 0.140609     | 0.202184    |
| SLC5A5          | 0.445648       | 0.234864     | 0.120485     | 0.199002    |

|           |          |          |          |          |
|-----------|----------|----------|----------|----------|
| SULT1C2   | 0.451324 | 0.223598 | 0.117475 | 0.207602 |
| SULT1C2P1 | 0.446766 | 0.225662 | 0.117733 | 0.209838 |
| TFF2      | 0.455366 | 0.236326 | 0.146285 | 0.162023 |
| UPK1B     | 0.430255 | 0.132439 | 0.132955 | 0.304352 |

$$\text{score} = \frac{\text{Sum of expression value in samples of specific tissue}}{\text{Sum of expression value in all samples}}$$

**Supplementary File S3: List of primers used in this study**

| Gene Name                 | Primer Orientation | Primer Sequence(5'-3')     |
|---------------------------|--------------------|----------------------------|
| HJURP                     | Forward            | CCTTCACG TTCAGG GAAATAG    |
| HJURP                     | Rverse             | CCAGGAGATTTGAGGCAATAC      |
| RNA39743 RefSeq_1746_1992 | Forward            | GCAACTGTCCAACAAGGTTT TAG   |
|                           | Rverse             | GGAACCGTCAGAAGCAAATTATAG   |
| RNA33853 lncRNAdb_60_500  | Forward            | GGAGCCTTTACAAGGGAATG       |
|                           | Rverse             | GGATCACAGTTCTGGAGGT        |
| RNA164968 XLOC_006294     | Forward            | GCAATGATGTTCCACAAGTTAG     |
|                           | Rverse             | CTGCAACCAGCATCTATGT        |
| RNA162407 XLOC_013947     | Forward            | GCCAATGCAAGACCCATTC        |
|                           | Rverse             | CCAGCAGATCTCTGTGTATGTC     |
| 18s rRNA                  | Forward            | GAG GAT GAG GTG GAA CGT GT |
|                           | Rverse             | TCT TCA GTC GCT CCA GGT CT |

**Supplementary File S4: The composition of transcripts collected in the custom-designed microarray**

| <b>Source</b>                       | <b>Number</b> |
|-------------------------------------|---------------|
| ENSEMBL                             | 12,754        |
| LincRNA Catalog                     | 8,195         |
| lncRNADB                            | 78            |
| LNCipedia                           | –             |
| RefSeq                              | 4,765         |
| UCSC                                | 13,521        |
| H-InvDB                             | 17,203        |
| NRED                                | 1,289         |
| lncRNAs from HOX loci               | 407           |
| lncRNAs from UCRs                   | 481           |
| lncRNAs from literature             | 529           |
| lncRNAs from IBP                    | 848           |
| lncRNAs with Enhancer-like Function | 2,975         |
| Antisense ncRNA pipeline            | 1,053         |
| Non-coding RNA Search               | 1,273         |
| snoRNA                              | 389           |
| Total                               | 65,760        |
| Total (non-redundant)               | 39,213        |
